# Supplementary material for: Carbon Flux Explorer optical assessment of C, N and P fluxes
Source: Copernicus journal article supplement (doi:10.5194/bg-16-1249-2019), 2019-03-27
Supplement: Supplementary file 1 [file bg-16-1249-2019-supplement.pdf]

Supplement of Biogeosciences, 16, 1249–1264, 2019  
<https://doi.org/10.5194/bg-16-1249-2019-supplement>  
© Author(s) 2019. This work is distributed under  
the Creative Commons Attribution 4.0 License.

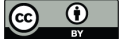

*Supplement of*

## **Carbon Flux Explorer optical assessment of C, N and P fluxes**

**Hannah L. Bourne et al.**

*Correspondence to:* Hannah L. Bourne (hbourne@berkeley.edu)

The copyright of individual parts of the supplement might differ from the CC BY 4.0 License.

Table S1

| cfe | dive | bottle | notes   | PN mmol/filter |            |          | POC     |                          |              | PP mmols/filter |                             |          | VA (mATN-            | VA (mATN-            |
|-----|------|--------|---------|----------------|------------|----------|---------|--------------------------|--------------|-----------------|-----------------------------|----------|----------------------|----------------------|
|     |      |        |         | raw            | corrected  | PN error | raw     | mmol/filter<br>corrected | POC<br>error | raw             | PP mmol/filter<br>corrected | PP error | cm <sup>2</sup> ) A* | cm <sup>2</sup> ) B* |
| 2   | 41   | 2      |         | 0.01551        | 0.0126052  | 0.0010   | 0.15696 | 0.125                    | 0.019        | 1.46E-03        | 1.38E-03                    | 4.90E-05 | 1358.97              | 1331.51              |
| 2   | 50   | 1      |         | 0.00705        | 0.0041452  | 0.0005   | 0.07696 | 0.045                    | 0.010        | 1.36E-04        | 4.69E-05                    | 2.96E-06 | 376.68               | 365.38               |
| 2   | 60   | 1      |         |                |            |          |         |                          |              | 1.96E-04        | 1.46E-04                    | 1.62E-05 | 420.00               | 411.85               |
| 4   | 60   | 1      | C:N >20 | 0.00583        | 0.0020158  | 0.0005   | 0.12964 | 0.067                    | 0.016        | 2.80E-04        | 1.59E-04                    | 1.74E-05 | 211.90               | 194.07               |
| 2   | 61   | 2      |         |                |            |          |         |                          |              | 1.70E-04        | 1.20E-04                    | 1.59E-05 | 230.70               | 136.76               |
| 2   | 62   | 3      |         |                |            |          |         |                          |              | 1.65E-04        | 1.15E-04                    | 1.59E-05 | 276.91               | 255.22               |
| 4   | 62   | 3      |         | 0.00497        | 0.0014300  | 0.0005   | 0.04742 | 0.011                    | 0.009        | 1.23E-04        | 5.00E-05                    | 1.55E-05 | 281.93               | 297.94               |
| 2   | 70   | 1      |         |                |            |          |         |                          |              | 8.55E-05        | 3.55E-05                    | 1.54E-05 | 528.79               | 527.93               |
| 4   | 70   | 1      |         | 0.01095        | 0.0055484  | 0.0007   | 0.11799 | 0.059                    | 0.015        | 6.67E-05        | 1.15E-05                    | 1.53E-05 | 326.72               | 319.73               |
| 2   | 71   | 2      |         | 0.00580        | 0.0028952  | 0.0005   | 0.07318 | 0.041                    | 0.010        | 1.55E-04        | 1.05E-04                    | 1.58E-05 | 542.68               | 524.79               |
| 4   | 71   | 2      |         |                |            |          |         |                          |              | 1.26E-04        | 5.23E-05                    | 1.56E-05 | 290.95               | 254.46               |
| 2   | 72   | 3      |         |                |            |          |         |                          |              | 8.20E-05        | 3.20E-05                    | 1.54E-05 | 536.39               | 552.96               |
| 4   | 72   | 3      | C:N >20 | 0.00507        | 0.0014915  | 0.0004   | 0.07934 | 0.033                    | 0.011        | 1.39E-04        | 6.16E-05                    | 1.56E-05 | 236.78               | 229.48               |
| 2   | 80   | 1      |         | 0.00318        | 0.0002752  | 0.0004   | 0.02668 | -0.005                   | 0.008        | 1.06E-04        | 8.66E-05                    | 6.50E-06 | 199.13               | 155.71               |
| 2   | 81   | 2      |         |                |            |          |         |                          |              | 6.35E-05        | 4.41E-05                    | 5.93E-06 | 114.46               | 133.41               |
| 2   | 82   | 3      | C:N >20 | 0.00532        | 0.0024127  | 0.0004   | 0.08365 | 0.052                    | 0.011        | 3.85E-05        | 1.91E-05                    | 5.76E-06 | 67.09                | 63.79                |
| 2   | 90   | 1      |         |                |            |          |         |                          |              | 1.48E-04        | 1.28E-04                    | 7.32E-06 | 151.91               | 151.96               |
| 4   | 90   | 1      |         | 0.00289        | -0.0000102 | 0.0004   | 0.04166 | 0.007                    | 0.008        | 4.91E-05        | 2.05E-05                    | 5.82E-06 | 100.53               | 97.69                |
| 2   | 91   | 2      |         | 0.00309        | 0.0001852  | 0.0004   | 0.03408 | 0.002                    | 0.008        | 6.77E-05        | 4.83E-05                    | 5.97E-06 | 85.43                | 86.09                |
| 4   | 91   | 2      |         |                |            |          |         |                          |              | 7.16E-05        | 3.60E-05                    | 6.02E-06 | 55.79                | 58.42                |
| 2   | 92   | 3      |         |                |            |          |         |                          |              | 5.29E-05        | 3.35E-05                    | 5.85E-06 | 34.10                | 21.03                |
| 4   | 92   | 3      |         | 0.00295        | 0.0000312  | 0.0004   | 0.03585 | 0.003                    | 0.008        | 3.97E-05        | 1.40E-05                    | 5.77E-06 | 24.63                | 50.16                |
| 4   | 100  | 1      |         |                |            |          |         |                          |              | 3.14E-04        | 2.64E-04                    | 1.80E-05 | 1034.43              | 1043.35              |
| 2   | 101  | 2      |         |                |            |          |         |                          |              | 4.35E-04        | 3.85E-04                    | 2.05E-05 | 1001.29              | 982.04               |
| 4   | 101  | 2      |         |                |            |          |         |                          |              | 1.49E-04        | 9.89E-05                    | 1.57E-05 | 954.72               | 932.89               |
| 2   | 102  | 3      |         | 0.00759        | 0.0046902  | 0.0005   | 0.08476 | 0.053                    | 0.011        | 2.34E-04        | 1.84E-04                    | 1.67E-05 | 518.71               | 535.28               |
| 4   | 102  | 3      |         |                |            |          |         |                          |              | 1.54E-04        | 1.04E-04                    | 1.58E-05 | 498.74               | 568.82               |
| 2   | 110  | 1      |         |                |            |          |         |                          |              | 3.26E-04        | 2.76E-04                    | 1.82E-05 | 818.42               | 855.87               |
| 4   | 110  | 1      |         | 0.01051        | 0.0076052  | 0.0007   | 0.09483 | 0.063                    | 0.012        | 2.66E-04        | 2.16E-04                    | 1.71E-05 | 657.29               | 737.10               |
| 2   | 111  | 2      | Jelly   | 0.00760        | 0.0046987  | 0.0005   | 0.06751 | 0.035                    | 0.010        | 4.34E-04        | 3.84E-04                    | 1.78E-05 | 744.60               | 673.86               |
| 4   | 111  | 2      |         |                |            |          |         |                          |              | 3.04E-04        | 2.54E-04                    | 2.05E-05 | 757.06               | 724.43               |
| 2   | 112  | 3      |         |                |            |          |         |                          |              | 2.07E-04        | 1.57E-04                    | 1.63E-05 | 1055.91              | 1033.01              |
| 4   | 112  | 3      |         | 0.00550        | 0.0025952  | 0.0004   | 0.06563 | 0.033                    | 0.010        | 1.03E-04        | 5.34E-05                    | 1.54E-05 | 288.21               | 278.28               |
| 2   | 113  | 4      |         |                |            |          |         |                          |              | 8.18E-05        | 3.18E-05                    | 1.54E-05 | 469.61               | 472.65               |
| 4   | 113  | 4      |         |                |            |          |         |                          |              | 1.42E-04        | 9.21E-05                    | 1.57E-05 | 95.46                | 89.13                |

Table S1 continued

| cfe | dive | VA (mATN-<br>cm <sup>2</sup> ) C* | VA (mATN-<br>cm <sup>2</sup> ) D* | mATN<br>stdev |        |
|-----|------|-----------------------------------|-----------------------------------|---------------|--------|
|     | 2    | 41                                | 1431.33                           | 1472.57       | 64.85  |
|     | 2    | 50                                | 437.69                            | 465.15        | 47.97  |
|     | 2    | 60                                | 437.64                            | 453.50        | 18.60  |
|     | 4    | 60                                | 228.52                            | 223.86        | 15.37  |
|     | 2    | 61                                | 234.96                            | 173.95        | 47.27  |
|     | 2    | 62                                | 292.57                            | 306.25        | 21.91  |
|     | 4    | 62                                | 350.74                            | 389.25        | 49.26  |
|     | 2    | 70                                | 557.52                            | 576.73        | 23.72  |
|     | 4    | 70                                | 362.24                            | 385.24        | 30.77  |
|     | 2    | 71                                | 543.49                            | 552.86        | 11.73  |
|     | 4    | 71                                | 298.14                            | 293.43        | 20.08  |
|     | 2    | 72                                | 561.02                            | 613.06        | 33.09  |
|     | 4    | 72                                | 273.77                            | 295.66        | 31.24  |
|     | 2    | 80                                | 219.30                            | 229.94        | 32.80  |
|     | 2    | 81                                | 173.29                            | 219.71        | 46.62  |
|     | 2    | 82                                | 70.08                             | 79.96         | 6.97   |
|     | 2    | 90                                | 153.28                            | 160.32        | 4.02   |
|     | 4    | 90                                | 101.69                            | 106.96        | 3.88   |
|     | 2    | 91                                | 86.54                             | 92.78         | 3.41   |
|     | 4    | 91                                | 65.72                             | 71.55         | 7.15   |
|     | 2    | 92                                | 34.91                             | 27.72         | 6.47   |
|     | 4    | 92                                | 50.16                             | 83.71         | 24.23  |
|     | 4    | 100                               | 1143.17                           | 1186.13       | 74.79  |
|     | 2    | 101                               | 1057.58                           | 1043.60       | 35.38  |
|     | 4    | 101                               | 1072.53                           | 1144.03       | 99.74  |
|     | 2    | 102                               | 600.90                            | 638.44        | 56.07  |
|     | 4    | 102                               | 631.80                            | 757.06        | 109.71 |
|     | 2    | 110                               | 1069.49                           | 1150.72       | 161.77 |
|     | 4    | 110                               | 1034.83                           | 1024.09       | 194.63 |
|     | 2    | 111                               | 1393.22                           | 1351.67       | 384.37 |
|     | 4    | 111                               | 849.03                            | 960.80        | 106.04 |
|     | 2    | 112                               | 1363.73                           | 1331.35       | 175.73 |
|     | 4    | 112                               | 357.07                            | 380.84        | 50.59  |
|     | 2    | 113                               | 494.64                            | 548.60        | 36.56  |
|     | 4    | 113                               | 172.58                            | 219.05        | 62.76  |

Table S1:

Data from this Table used to make figure 5

Table shows CFE number, dive number, bottle number and PN, POC and PP data. PN, POC and PP data is reported both as raw values and also as corrected values.

If a sample analysis was replicated, the average of the replications is reported.

Corrected values have been blank corrected, and CFE4 location 1,2 and 3 have been divided by 1.45 as discussed in section 3.2

The 1.45 correction affected 6 POC and PN samples : CFE4 dive 60, 62, 70, 72, 90 and 92.

\*VA is the abbreviation for Volume Attenuance

Cumulative VA was blank corrected in 4 different ways.

(A) was calculated by subtracting the clean at the beginning of the cycle from the final particle laden image of an imaging cycle (Bishop et al. 2016).

(B) was calculated by subtracting the clean image of the next image cycle from the final particle image of the previous cycle. Used in our regression analysis

(C) The lowest value of attenuance of cleaning image of a dive was subtracted from the particle laden image at the end of an imaging sequence.

Assumes all material above lowest blank transferred

(D) The attenuance of the final clean image for a dive was subtracted from the sum of the cumulative attenuance from each imaging sequence and the attenuance of the initial clean image.

Method B used in this paper yielded the highest  $r^2$  values and thus was determined to be the best measure of the amount of material entering the sample bottle.

The uncertainty of the attenuance measurement was the standard deviation of the methods A, B, C and D.

Sample Notes:

CFE 2 dive 111 were not included in any plots due to imagery contamination by a living 1 cm scale gelatinous organism

Samples CFE 2 dive 82, CFE 4 dive 72, and CFE 4 dive 60 were not used in POC VA analysis.

| mATN-cm <sup>2</sup> -cm <sup>-2</sup> -day <sup>-1</sup> | mATN-cm <sup>2</sup> -cm <sup>-2</sup> -day <sup>-1</sup> error | POC Flux corrected       |      | CFE | DIVE | DAYS  | POC flux error/m <sup>2</sup> /day |
|-----------------------------------------------------------|-----------------------------------------------------------------|--------------------------|------|-----|------|-------|------------------------------------|
|                                                           |                                                                 | mmol/m <sup>2</sup> /day | ay   |     |      |       |                                    |
| 42.70                                                     | 2.08                                                            | 40.03                    | 6.21 | 2   | 41   | 0.167 |                                    |
| 9.63                                                      | 1.26                                                            | 11.81                    | 2.75 | 2   | 50   | 0.204 |                                    |
| 9.97                                                      | 1.65                                                            | 3.52                     | 1.99 | 4   | 62   | 0.161 |                                    |
| 7.69                                                      | 0.74                                                            | 14.24                    | 2.43 | 4   | 70   | 0.223 |                                    |
| 16.84                                                     | 0.38                                                            | 13.17                    | 3.25 | 2   | 71   | 0.167 |                                    |
| 4.74                                                      | 1.00                                                            | -1.66                    | 2.55 | 2   | 80   | 0.176 |                                    |
| 2.50                                                      | 0.10                                                            | 1.68                     | 1.50 | 4   | 90   | 0.209 |                                    |
| 2.76                                                      | 0.11                                                            | 0.62                     | 2.68 | 2   | 91   | 0.167 |                                    |
| 6.32                                                      | 3.05                                                            | 3.22                     | 7.27 | 4   | 92   | 0.043 |                                    |
| 17.92                                                     | 1.88                                                            | 17.61                    | 3.73 | 2   | 102  | 0.160 |                                    |
| 13.19                                                     | 3.48                                                            | 11.22                    | 2.17 | 4   | 110  | 0.300 |                                    |
| 5.36                                                      | 0.98                                                            | 6.46                     | 1.85 | 4   | 112  | 0.279 |                                    |

Table S2:

Data from this table was used to make figure 6.

Data shows VAF (mATN-cm<sup>2</sup>-cm<sup>-2</sup>-day<sup>-1</sup>) with associated error, POC flux (mmol C/m<sup>2</sup>/day) with associated error

The CFE number, dive number and day fraction of sampling period
